# Supplementary material
Source: publisher site journal article supplement (https://www.dovepress.com/article/431121)
Supplement: Supplementary file 1 [file get_supplementary_file.php]

|  | TAC branded | TAC generic | Csa branded | CsA generic | MYC branded | MYC generic |  | Kidney | Liver |
| --- | --- | --- | --- | --- | --- | --- | --- | --- | --- |
| Kidney | 824 | 1530 | 300 | 327 | 983 | 1160 |  |
| Liver | 525 | 993 | 47 | 176 | 333 | 329 |  |
| TAC branded | ✔ |  |  |  |  |  |  | 503 | 563 |
| TAC branded, mTORi | ✔ |  |  |  |  |  |  | 0 | 0 |
| TAC branded, MYC branded | ✔ |  |  |  | ✔ |  |  | 687 | 273 |
| TAC branded, MYC generic | ✔ |  |  |  |  | ✔ |  | 338 | 155 |
| TAC generic |  | ✔ |  |  |  |  |  | 197 | 341 |
| TAC generic, mTORi |  | ✔ |  |  |  |  |  | 0 | 0 |
| TAC generic, MYC branded |  | ✔ |  |  | ✔ |  |  | 317 | 33 |
| TAC generic, MYC generic |  | ✔ |  |  |  | ✔ |  | 307 | 150 |
| CsA branded |  |  | ✔ |  |  |  |  | 136 | 148 |
| CsA branded, mTORi |  |  | ✔ |  |  |  |  | 0 | 0 |
| CsA branded, MYC branded |  |  | ✔ |  | ✔ |  |  | 44 | 9 |
| CsA branded, MYC generic |  |  | ✔ |  |  | ✔ |  | 144 | 16 |
| CsA generic |  |  |  | ✔ |  |  |  | 124 | 43 |
| CsA generic, mTORi |  |  |  | ✔ |  |  |  | 0 | 0 |
| CsA generic, MYC branded |  |  |  | ✔ | ✔ |  |  | 8 | 0 |
| CsA generic, MYC generic |  |  |  | ✔ |  | ✔ |  | 166 | 4 |
| Other (CsA+TAC) |  |  |  |  |  |  |  | 5 | 3 |
| MYC branded |  |  |  |  | ✔ |  |  | 104 | 13 |
| MYC generic |  |  |  |  |  | ✔ |  | 26 | 8 |

Table S1. Therapeutic combinations prescribed in the 30 days post-transplant (index therapy) in the cohort of kidney and liver recipients
